# Supplementary material for: Apps for asthma self-management: a systematic assessment of content and tools
Source: BMC Med. 2012 Nov 22;10:144. doi: 10.1186/1741-7015-10-144 (PMC3523082; doi:10.1186/1741-7015-10-144)
Supplement: Additional file 4 — Characteristics and quality appraisal of apps presenting information about asthma. Methods used for quality appraisal are described in the text. [file 1741-7015-10-144-S4.XLSX]

## Sheet: Table 5
Table 5
Characteristics and quality appraisal of information-containing apps
									Quality appraisal
Basic details					Characteristics								Content comprehensiveness**									Consistency with evidence-base***										HON Domains****								Sofware behaviour†
App	Version	Platform	Cost		Description	CAM?*	Format		Basic facts	Allergens and triggers	Nature of treatment	Recognising exacerbations	Using treatment	Self-monitoring skills	Action plans	Personalisation		Removal of pets	Fungal allergen avoidance	Cockroach avoidance	Cessation of smoking	Passive smoke avoidance	Air pollution avoidance	Immunotherapy for atopy	Weight reduction in obesity	Seasonal ‘flu vaccination		Attribution	Purpose clearly stated	Privacy policy	Information referencing	Contact details	Funding model clear	Editorial/advertising policy		Presentation / user interface	Crash	Other		Comments
A Yoga Cure::: Fitness Panacea	3.0.0	Blackberry	£2.99		Yoga instructional app with text and animations	Y	Mixed media content																						+
Additive Warning	1.1.0.0	Windows Phone 7	Free		Food additive glossary	N	Textual content (directory or glossary)																						+			+	+			!				Cannot scroll info page. Content error: entry for alkanet contains commentary for invertase.
Allergies and Cures	1.0	Android	£0.86		Allergy eBook	N	Textual content (structured text)		+																				+
Allergy Free Kids Ebook	1.0	iPhone	£1.49		eBook on allergy_x000D_ _x000D_ _x000D_	N	Textual content (eBook)			+								+	+	+			+						+				+
Allergy Glossary	1.0	iPhone	£1.49		Glossary of allergy terms	N	Textual content (directory or glossary)		+		+				+														+			+	+			!				App mis-titled as asthma glossary
Allergy Relief Sourcebook	1.0	Android	£0.86		Allergy eBook	B	Textual content (eBook)		+	+	+		+	+					+	+	++	++	+			+			+							!				Proofing errors e.g. "Do you have sinuses" tacked on to the end of a paragraph about food before exercise. Repetitive content in many sections.
Asthma	1.0	Android	£1.84		Clinical flipcards	N	Textual content (flipcards)																						+			+				!				"How dowomen [sic]"
Asthma	1.4	iPhone	£2.49		Asthma eBook	N	Textual content (eBook)		++	+	++	+	+	++	++	++			+	+	++	++	+			++		+	+			+
Asthma Glossary	1.0	Android	£0.61		Glossary of asthma terms	N	Textual content (directory or glossary)		+		+				+														+							!				Duplication of terms (e.g. wheezing) and homonyms not grouped into a single concept.
Asthma Glossary	1.0	iPhone/iPad	£0.69		Glossary of asthma terms	N	Textual content (directory or glossary)		+																				+							!				Duplication of terms (e.g. wheezing) and homonyms not grouped into a single concept.
Asthma Info	1.0	Android	Free		Asthma-related link aggregator, packaged as an app	N	Textual content (directory or glossary)																													!				If app is suspended, you can stuck on a particular article without being able to get back to index page. App does not work without network connectivity
Asthma Maze - Find out which Food Additives or Cosmetic Ingredients can trigger an Asthma attack	5	iPhone	£0.69		Food additive glossary	N	Textual content (directory or glossary)																					+	+			+	+
BronchitisGuide	1.0	iPhone	£1.49		eBook with content about asthma	N	Textual content (structured text)		++	++	+	+			+						++	++		++				+	+			+				!				Tabular content not faithfully reproduced.
Chemical Maze - Complete Edition -The ultimate shopping guide to decode the Food Additives and Cosmetic Ingredients Maze	5	iPhone	£4.99		Food additive glossary	N	Textual content (directory or glossary)																					+	+			+	+				!	!		App crashed during use. Bug in filter item selection.
Child health - plain English health information	1.0.1	iPhone	£2.99		Structured content child health	N	Textual content (structured text)		+	+	++											++	++					+	+		+	+	+
Chronic Asthma	1.0.1	Android	£6.15		Video introduction to asthma	N	Multimedia content (video)		+	+	++	+	+	+							++	++			++			+	+			+
Chronic Diseases	1.0	Android	£3.07		eBook on chronic disease	B	Textual content (eBook)		+	+		+											+					+	+							!				"This helps to loosen the mucous and allowing it [sic] to come out with the help of gravity"
Dangerous Food Additives	1.0	Android	Free		Food additive glossary	N	Textual content (directory or glossary)																						+
Dealing with Bronchitis	2.2	Android	£0.61		Structured content on bronchitis and asthma	N	Textual content (structured text)		+	+																										!				Irrelevant content, e.g. long discourse on World Asthma Day "asmatic bronchitis"
E Numbers	1.0	Android	£3.52		Food additive glossary	N	Textual content (directory or glossary)																					+	+			+	+
Emergency First Aid + Treatment Guide	1.0.0	Blackberry	£0.99		General first aid guide	N	Textual content (structured text)		+	+		+																	+			+
Emergency First Aid Guide	4.0	Android	£0.61		General first aid guide	N	Textual content (structured text)		+	+		+																	+			+
Everything About Asthma	1.0	Android	£3.07		Asthma management eBook	B	Textual content (eBook)		++	+	++	++	+	+				++	+	+	++	++	+		++			+				+				!				Lack of hyphens in text.
Everything You Wanted To Know About Asthma	1.2	iPhone/iPad	£2.49		Asthma eBook	B	Textual content (eBook)		++	+	++	++	+	+				++	+	+	++	++	+		++			+	+			+				!	!			App crashed during searching. Lack of hyphens in text.
First_Aid	11.1	iPhone	£1.49		Interactive first aid quiz	N	Textual content (structured text)					+																	+							!		!		Better luck beating your previous score' message even if score is 100% Asthma is a conditioned caused by an allergic reaction [sic] . Try to take the casualtys mind of [sic] the attack
Fluffer Lost His Puffer	1.01	iPhone/iPad	£1.99		Childs asthma story eBook	N	Mixed media content																					+	+
Focus Medica - Flip Throughs - Diseases and Disorders	1.1	iPad	£1.49		Video introduction to asthma	N	Multimedia content (video)		+												++	++			++				+			+	+
Food Additives 2	2.0.3	iPhone	£2.49		Food additives directory	N	Textual content (directory or glossary)																					+	+			+
Food Additives 2: FREE +	2.0.1	iPhone	Free		Food additive directory	N	Textual content (directory or glossary)																					+	+			+
Glossary of Stimulant Herbs	1.0	iPhone	£0.69		Glossary of herbs with 'stimulant' properties_x000D_ _x000D_ _x000D_	Y	Textual content (directory or glossary)																						+							!				Duplication of terms e.g. Curcuma Longa
Guide to Bronchitis	1.0	Android	£3.09		Bronchitis eBook	N	Textual content (structured text)		+																++				+
Health Doctor LITE	1.0	Android	£0.77		Yoga app	Y	Mixed media content																						+			+
Health Doctor MAX	1.0	Android	£3.07		Yoga app	Y	Mixed media content																						+			+
Health Doctor PRO	1.0	Android	£1.84		Yoga app	Y	Mixed media content																						+			+
Health Yoga MAX	1.0.0	Blackberry	£2.99		Yoga instructional app	Y	Mixed media content																						+			+
How to Control Asthma and Allergy	1.1	iPhone	£2.49		eBook on asthma and allergy	B	Textual content (eBook)		+		+		+	+							++	++						+	+
iMobile Care	1.1	iPhone	£1.49		ICE information and basic first aid guide	N	Textual content (structured text)					+																	+							!				All fields are complasory!' spelling mistake in UI.
iMothers Health, Old School Remedies	1	iPhone	£1.99		Natural remedies structured content	Y	Textual content (structured text)																						+			+	+
Kyusho Healing	2.01	iPhone/iPad	£1.49		Kyusho alternative medicine	Y	Mixed media content																					+	+			+				!				Once on the shop screen cannot exit. Requires network connectivity for details of videos.
Kyusho Health & Wellness	1.0	Android	£1.31		Kyusho healing instructions	Y	Mixed media content																									+
Lemon Cures	1.0	iPhone	£0.69		Lemon as natural remedy for range of conditions	Y	Textual content (structured text)																						+			+
Living Well With Asthma	1.0	iPhone	£0.69		Structured content on asthma	N	Textual content (structured text)		++	+	+		++	+	++				+	+	++	++	+		++	+			+			+
Lungs & Breathing	1.1	iPhone	Free		Glossary of respiratory terms	N	Textual content (directory or glossary)		+		+
Lungs and Breathing Info	1.0.0	iPhone	Free		Glossary of respiratory terms	N	Textual content (directory or glossary)		+		+																		+
Meditation Mystery and Mastery	1.0	Android	Free		Medication eBook	Y	Textual content (eBook)																						+			+
My Mobile Guru	1.0	iPhone	£0.69		Motivational audio recordings	N	Multimedia content (audio)		++	+	++	+						+			++	++	+			+		+	+			+
National Institutes of Health Asthma Consultant	1.0.5	Blackberry	£3.99		Asthma structured content	N	Textual content (structured text)		++	+	++	+	++	++	++	++		+	++	+	++	++	++	++	++	+			+			+
Natural Cures & Remedies	1.0	Android	£1.22		Link to PDF of natural remedy guide	Y	Textual content (eBook)																						+							!				Hyperlinks in PDF don't work Essentially unusable on small form factor device "Asthama" [sic]
Quick and Easy Yoga	1.0	Android	£1.84		eBook on Yoga	Y	Textual content (eBook)																									+
SpiritMudras	1.5	iPhone	Free		Hand positions for control of multiple conditions	Y	Mixed media content
Truth About Asthma	1.0	Android	£0.86		Asthma eBook	N	Textual content (structured text)		++	++	++	++	+	++	++	+			+										+
Understanding Disease: Opthalmology & Respiratory Diseases, Focus Medical Animation	1.0	iPhone/iPad	£6.99		Video content on asthma	N	Multimedia content (video)		+	+	++	+	+	++							++	++			++			+	+							!				Guide on using MDI says to hold in front of mouth and breath in (when not using a space: animation shows this).
Vinegar for your Health	1.2.2	Android	£0.61		Vinegar eBook	Y	Textual content (eBook)																						+
Welcome to Homeopathy	1.0	Android	£3.07		eBook on homeopathy	Y	Textual content (eBook)																					+	+							!				"Sinus infection or glu [sic]"
Workout and Exercise	2.0.3	Android	£0.61		Exercise eBook with section on asthma	N	Textual content (structured text)		+	+									+		++	++	+			+										!				Text flow problems. Grammar errors "even small amounts of alcohol with [sic] increase muscular strength"
Yoga for Health	1.4	Android	£0.87		Structured content on Yoga	Y	Textual content (structured text)																						+			+				!				Requires network connectivity to cache content. Multiple formatting issues with text.
Legend:						*Key to symbols:			** Key to symbols:									*** Key to symbols:										****Assessment criteria are presented in Table 3								† Key to symbol:
Quality domains of content comprehensiveness and consistency with evidence are described in the text.						Y = App contains exclusively CAM content			+ = topic partially addressed									+ = Recommendation consistent with evidence base but does not capture uncertainty																		! = Issue present
						B = App blends CAM and conventional medical content			++ = topic comprehensively addressed									++ = Recommendation appropriate or adequately captures uncertainty																		Details of software issue types are presented in Table 4
Abbreviations:						N = App contains conventional medical content only			Assessment criteria are presented in Table 1									- = Recommendation differs in direction from evidence base
HON = Health on the Net Foundation criteria, adapted for use with apps.																		Assessment criteria are presented in Table 2
CAM = Complementary and Alternative Medicine
										Excluded from assessment since only addresses CAM (Complementary and Alternative Medicine) topic(s).																					None of the information apps assessed involved data collection
