# Supplementary material for: Apps for asthma self-management: a systematic assessment of content and tools
Source: BMC Med. 2012 Nov 22;10:144. doi: 10.1186/1741-7015-10-144 (PMC3523082; doi:10.1186/1741-7015-10-144)
Supplement: Additional file 7 — Characteristics and quality appraisal of diary apps. Methods used for quality appraisal are described in the text. [file 1741-7015-10-144-S7.XLSX]

## Sheet: Table 6
Table 6
Characteristics and quality appraisal of diary app and medication trackers
					Characterisation																		Quality appraisal
Basic details									Diary/tracker features					Analytical features				Other features					HON Domains†							Software behaviour‡
App	Version	Platform	Cost		Description	Peak flow recording	Symptom recording	Medication recording*	Action plan**		Peak flow classification***	Decision support****	Graph		Data sharing	Backup	Password security		Attribution	Purpose clearly stated	Privacy policy	Information referencing	Contact details	Funding model clear	Editorial/advertising policy		Data entry validation	Presentation / user interface	Crash	Other		Comments
Allergy Tracker	3.4	Android	Free		Allergy (pollen) geocoder and symptom diary		a	D								a				+	+									!		Requires network connectivity to work
Asthma Journal	1.1	Android	£3.07		Asthma peak flow, symptom and medication diary	a	a	D					a		a	a				+			+				!					Does not sense check PEFR readings (constrained > 0) Google Health is being withdrawn on January 01 2012.
Asthma journal (iAsthma)	1.1	iPhone	£0.69		Asthma symptom geocoder	a	a	D							a					+	+			+				!				Essentially unusable. App prompts to purchase irrelevant content on install.
Asthma Journal Free	1.3	iPhone	Free		Peak flow, symptom, trigger, allergen and medication log	a	a	D							a	a				+							!	!		!		Some information source websites broken (e.g. Paint). No sense checking for negative; 0; PEFR values > 1000. Product info link is broken. Product info displayed only when network connectivity; Google Health is being withdrawn on January 01 2012. "Asthma-causing Allgergens"
Asthma Journal Pro	1.2	iPhone	£2.49		Peak flow, symptom, trigger, allergen and medication log	a	a	D					a		a	a				+			+				!	!		!		Some information source websites broken (e.g. Paint). No sense checking for negative; 0; PEFR values > 1000. Product info link is broken. Product info displayed only when network connectivity; Google Health is being withdrawn on January 01 2012. "Asthma-causing Allgergens"
Asthma Tracker	1.0.0	Blackberry	£2.99		Peak expiratory flow rate, trigger and medication log	a	a	D					a		a	a				+			+				!					PEFR value unconstrained 0, -ve, > 999
Asthma Tracker & Log	1.10.1	Android	£0.61		Peak expiratory flow rate, medication, attack log	a	a	D	3		P	ARP	a		a	a				+			+	+			!					Values >999 can be logged as PEFR
Asthma Tracker & Log (Free)	1.10.1	Android	Free		Peak expiratory flow rate, medication, attack log	a	a	D	3		P	ARP	a		a	a				+			+	+			!					Values >999 can be logged as PEFR
Asthma Tracker by healthycloud.com	1.2	iPhone	£1.99		Peak flow and medication log	a	a	D					a				a			+			+
Asthma Tracker Pro	1.0.0	Android	£1.84		Custom longitudinal symptom log		a	D							a					+							!					Data entered on a particular date will overwrite existing data without warning.
Asthma-Charter	6.1	iPhone	£0.69		Peak flow, weight and medication log	a		D			P		a		a					+			+				!	!				PEFR diary: No sense checking for 0, negative, >1000. Cannot edit existing entries. Medication navigation buttons broken. Predicted PEFR can enter negative heights and weight, no upper value validation. No key to explain how to enter dosing information. You need to press 'Save' to enter unlock password (unintuitive UI)
Asthma-Charter MMC	1.0	iPhone	£0.69		Peak flow, weight and medication log	a		D			P		a		a					+							!	!				No sense checking for 0, negative, >1000. Cannot edit existing entries. Peak flow prediction: height dialog is labelled as weight during editing, values <0 and >999 can be entered. Imperfect translation on some dialog boxes, e.g. Leerzeichen for space on keyboard.
AsthmaCheck	1.5	iPhone	Free		Diary and medication tracker that incorporates asthma assessment tool	a	a	DT			B		a		a				+	+	+		+				!	!				pMDI pack size of 0 doses can be set Relies on user understanding 80% of personal best. Not all features translated into English
AsthmaMD	1.0	iPhone	Free		Peak flow, symptom, trigger and medication log	a	a	D			P		a		a	a	a			+	+		+					!	!			App crashed during data entry of predicted parameters. Bug in date entry - 1/Jan/2010 on roller is interpreted as 01/01/2009. By default, submits anonymous user data to AsthmaMD for research purposes. "You may choose not to participate and deactivate data transmission using the switch on the bottom of the license agreement." Not all translated into English, e.g. 'Fertig' instead of OK on dialog b…
AsthmaPulse	1.10	iPhone	£2.49		Peak flow, symptom, trigger and medication log	a	a	D	3		B	ARP	a		a		a			+	+		+	+				!	!			Drug entry doesn't allow microgram doses to be entered for inhalers. Displays action plan recommendations when entering PEFR even if plan has not been customised. App crashes during use x 1. Text incompletely translated, e.g. 'Fertig' instead of OK on dialog boxes.
asthmaTrack	1.2	iPhone	£1.49		Asthma, vital sign and medication log	a	a	D			P		a		a					+			+
HealthLog	2.1	iPhone	£1.49		Multiple bioparameter log including peak flow	a	a								a				+	+			+				!	!		!		Peak flow values > 999 can be entered. Email button in app doesn't work. Spelling: "statictics [sic] used in the program."
iAsthma GPS Tracker HD	1.0	iPhone/iPad	£0.69		Asthma symptom geocoder		a													+
iAsthma GPS Tracker HD Lite	1.0	iPhone/iPad	Free		Asthma symptom geocoder		a													+										!		GPS function did not appear to work.
iAsthma in Control	1.1	iPhone	£0.69		Asthma medication log and management plan for children, incorporating asthma assessment tool	a	a	D	3			AR								+
Inhaler Tracker	1.12.2	iPhone	£1.49		pMDI dose tracker _x000D_			DT												+			+				!					No upper range validation for actuations. Limited number of images in photo gallery customisation - colours (e.g. red) do not correspond to UK inhalers.
My Asthma Log Pro	1.0.1	Android	Free		Asthma attack log		a	D								a				+			+						!			Application crashed when attempted to back up.
myFitnessCompanion	1.1.9	Android	Free		Bioparameter log	a	a	D				AR	a		a	a				+			+							!		Manual data entry features stop working once verified as Bronze (i.e. once network connectivity established for first time) Manual data entry features stop working once verified as Bronze (i.e. once network connectivity established for first time); Google Health is being withdrawn on January 01 2012.
Peakflow	2.20	Android	Free		Peak expiratory flow rate log	a							a		a	a				+			+	+			!					PEFR of 0 can be entered.
PeakFlowLog	1.1.0	Android	£0.8		Peak expiratory flow rate log	a					BP	A	a		a	a				+							!	!				Some controls not visible on small resolution screen. Values > 999 can be entered in log. Height of zero can be entered and values > 999 can be logged. "Peek Flow" [sic] "Moman" [for Gender]
Puffometer	1.0	iPhone	Free		pMDI dose tracker			T												+			+	+			!					No upper range validation for pMDI dose, e.g. >999 can be entered.
Smartinhalerlive	1.0.0.0	Windows Phone 7	Free		Electronic pMDI Peak expiratory flow rate and medication log	a		DT					a		a	a	a			+			+	+			!			!		No range validation for PEFR; can log values of 0 during manual entry. No longer able to log in to retrieve cloud data.
SmartinhalerLive	1.0	iPhone	Free		Logbook app for electronic pMDI	a		DT								a				+			+	+
Trackers Combo	1.0.0	Blackberry	£8.99		Peak expiratory flow rate, trigger and medication log	a		D					a		a	a				+							!					PEFR value unconstrained 0, -ve, > 999
									** Number of stages in action plan, if supported
Abbreviations:																			†Assessment criteria are presented in Table 3
HON = Health on the Net Foundation criteria, adapted for use with apps.								*Key to abbreviations:																			‡ Key to symbol:
								D = Medication administration diary																			! = Issue present
								T = Tracks dose remaining in inhaler																			Details of software issue types are presented in Table 4
											***Key to abbreviations:
											B = Personal best used to classify readings
											P = Predicted value used to classify readings
												****Key to abbreviations:
												A = Alerts triggered by changing peak flow or symptoms
												R = Treatment recommendations made based on data
												P = Action plan used to make treatment recommendations
