# Supplementary material for: Apps for asthma self-management: a systematic assessment of content and tools
Source: BMC Med. 2012 Nov 22;10:144. doi: 10.1186/1741-7015-10-144 (PMC3523082; doi:10.1186/1741-7015-10-144)
Supplement: Additional file 9 — Characteristics of other apps. The table summarizes apps not fitting into other categories. [file 1741-7015-10-144-S9.XLSX]

## Sheet: Additional File 6
Additional File 6
Characteristics of other apps
App	Version	Platform	Cost	Description	CAM?*
AQMD	1.2	iPhone	Free	Air quality information	N
Healing chants and Mantras	1.0.0.0	iPhone/iPad	£1.49	Music therapy (mantras) for asthma	Y
Healing Mantras for Asthma	1.0.3	Blackberry	£0.99	Musical mantras	Y
iSmog	4.0	iPhone	Free	Air quality information	N
Oreck Air Quality Forecast	1.8	iPhone	Free	Air quality information	N
Pollen Alert	1.0	Android	Free	Pollen alert	N
Pollen.com's Allergy Alert	1.1.0	Android	Free	Pollen alert	N
Abbreviations:					*Key to symbols:
CAM = Complementary and Alternative Medicine					Y = App contains exclusively CAM content
					B = App blends CAM and conventional medical content
					N = App contains conventional medical content only
